# Supplementary material for: Pharmacological Inhibition of TFF3 Enhances Sensitivity of CMS4 Colorectal Carcinoma to 5-Fluorouracil through Inhibition of p44/42 MAPK
Source: PubMed Central journal article supplement (PMC6940926; doi:10.3390/ijms20246215), 2019-12-09
Supplement: ijms-20-06215-s001.pdf [file ijms-20-06215-s001.pdf]

Supplementary Figure 1

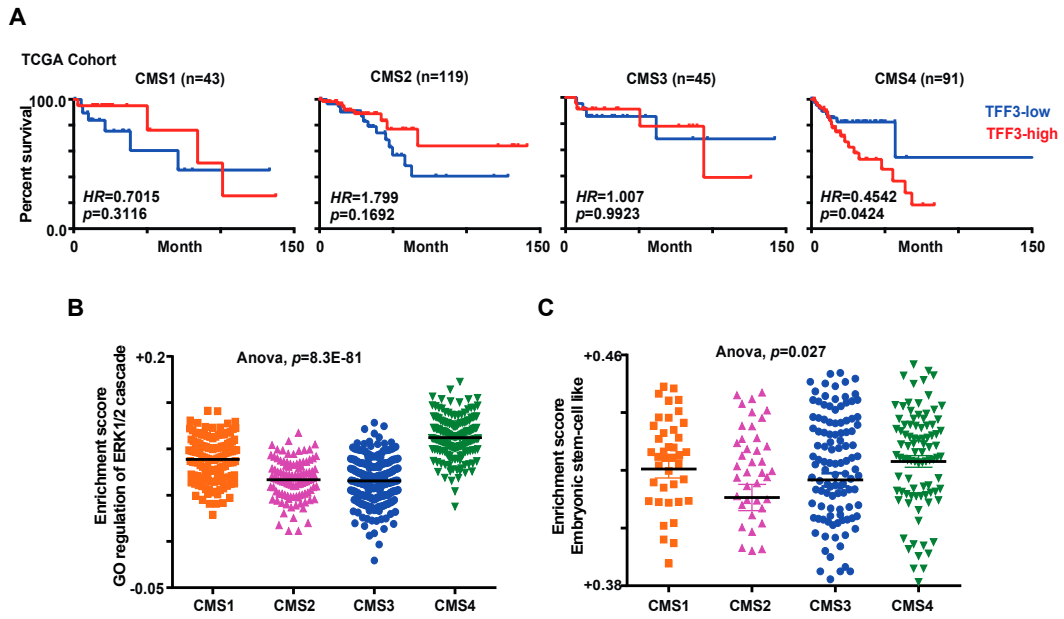

Figure S1. Clinical relevance of TFF3 in CRC.

Supplementary Figure 2

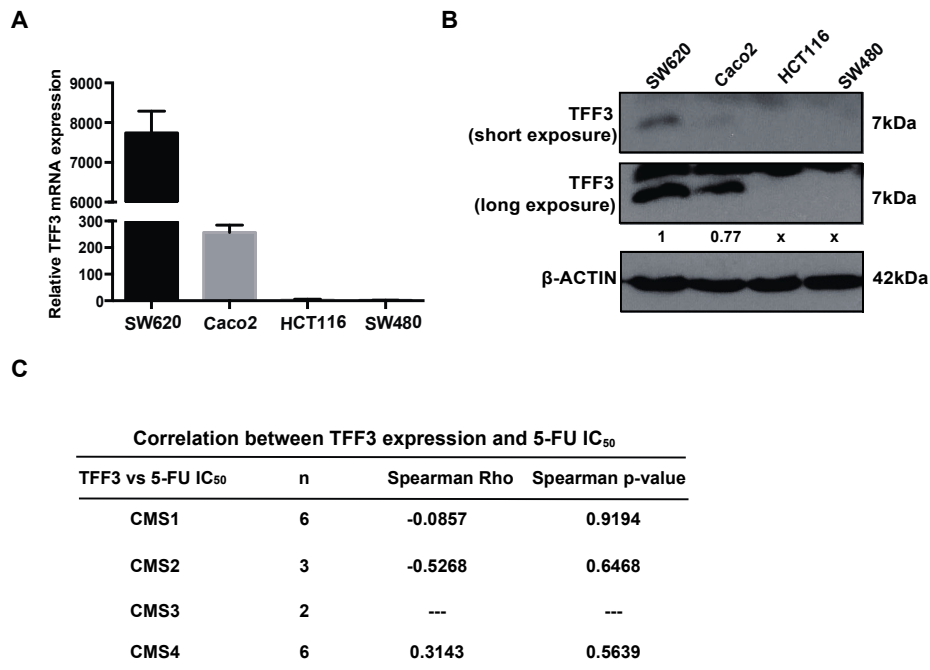

Figure S2. TFF3 expression in CMS4 CRC cell lines.

Supplementary Figure 3

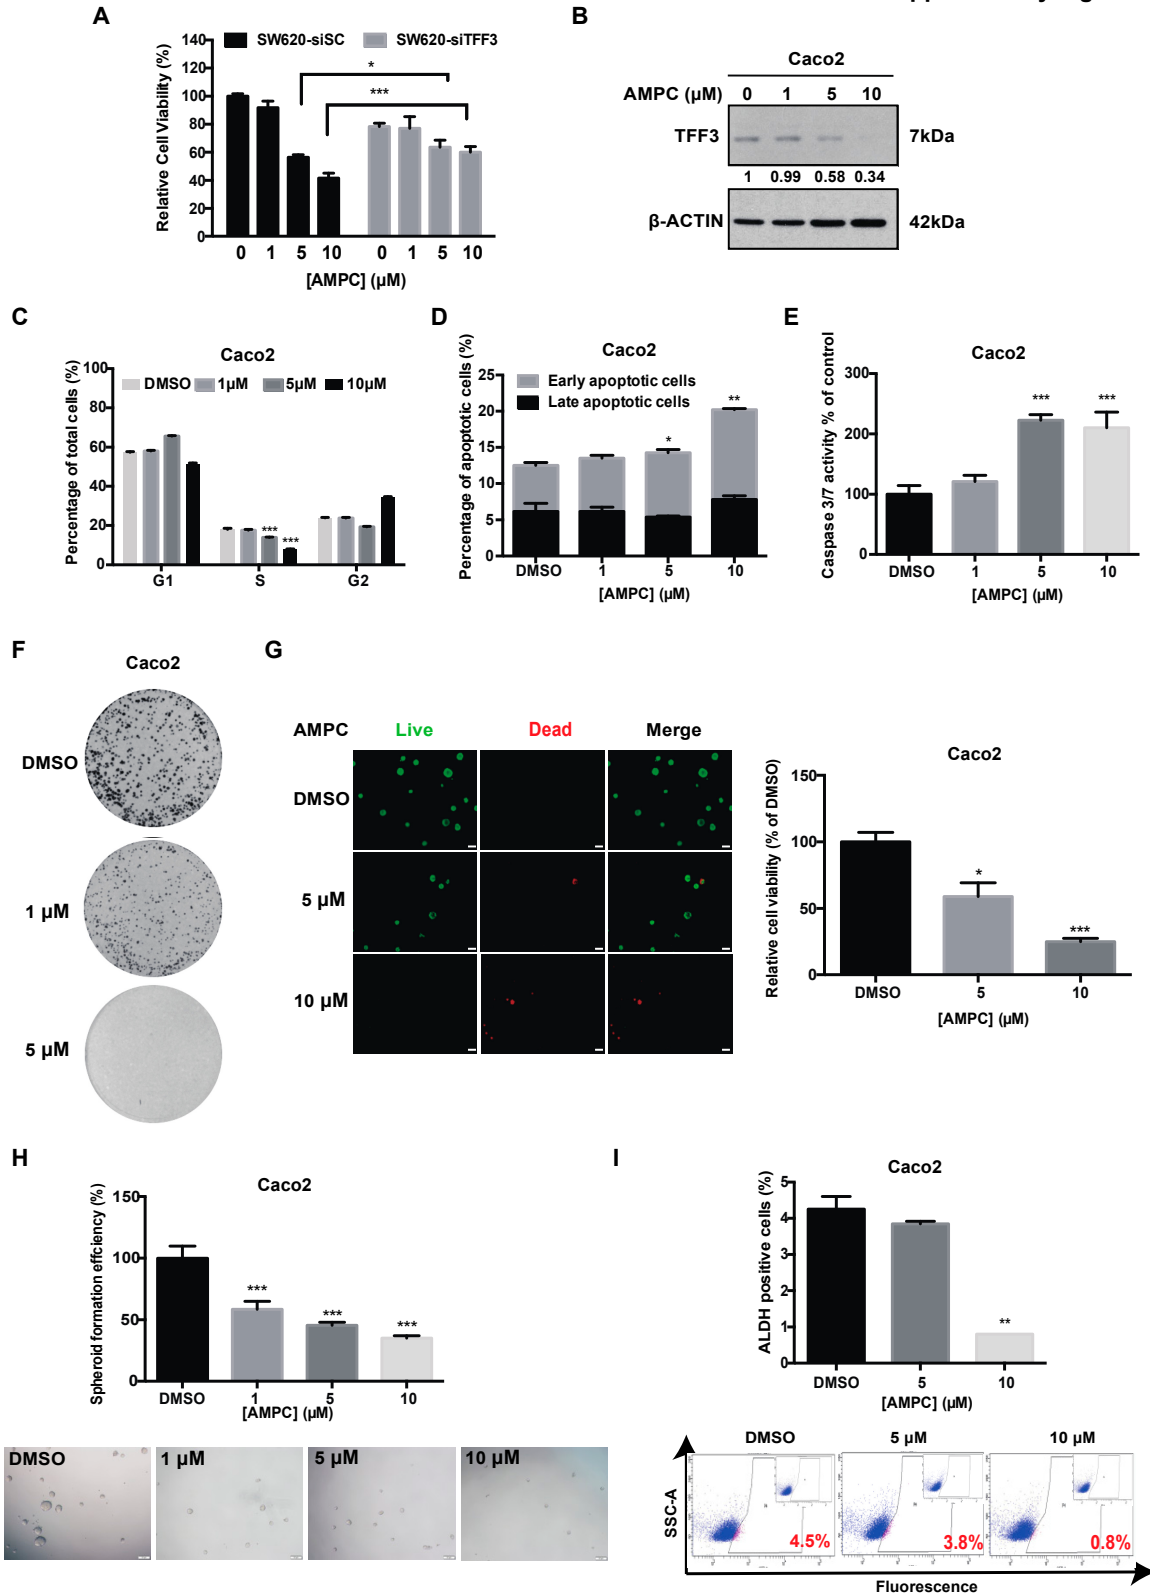

Figure S3. Functional effects of inhibition of TFF3 by AMPC in Caco2 cells.

Supplementary Figure 4

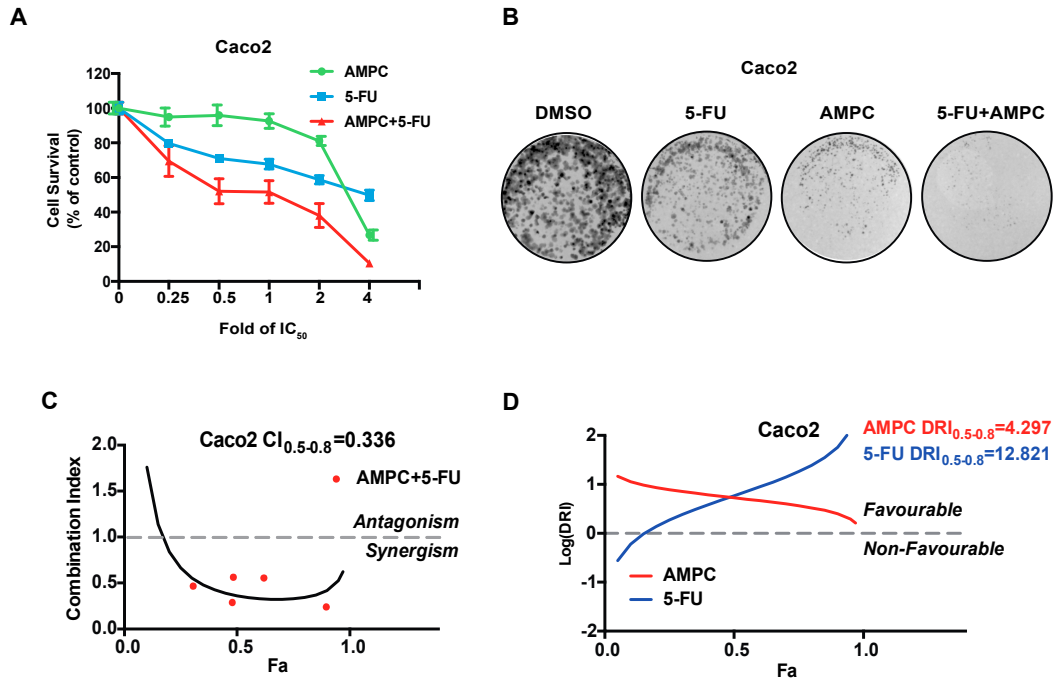

Figure S4. Synergistic inhibitory effects of AMPC and 5-FU in Caco2 cells.
